# Supplementary material for: Two solvent and temperature dependent copper(ii) compounds formed by a flexible ligand: syntheses, structures and SC–SC transformation
Source: Royal Society of Chemistry journal article supplement (doi:10.1039/c2dt30611e), 2012-01-01
Supplement: c2dt30611e.pdf [file c2dt30611e.pdf]

Supporting information

## Two Solvent and Temperature Dependent Copper(II) Compounds Formed by a Flexible Ligand: Syntheses, Structures and Properties

Haixia Sun,<sup>a</sup> Wenli Xie,<sup>a</sup> Shenghong Lv,<sup>a</sup> Yan Xu,<sup>b</sup> Yong Wu,<sup>a</sup> Min Fang,<sup>a\*</sup> Hong-ke Liu<sup>\*a</sup>

Fig. S1 PXRD patterns of (a) **1** simulated, (b) heating product of **1** in H<sub>2</sub>O/CH<sub>3</sub>CN at 80 °C, (c) heating product of **1** in H<sub>2</sub>O/CH<sub>3</sub>CN at 90 °C, (d) **2** simulated.

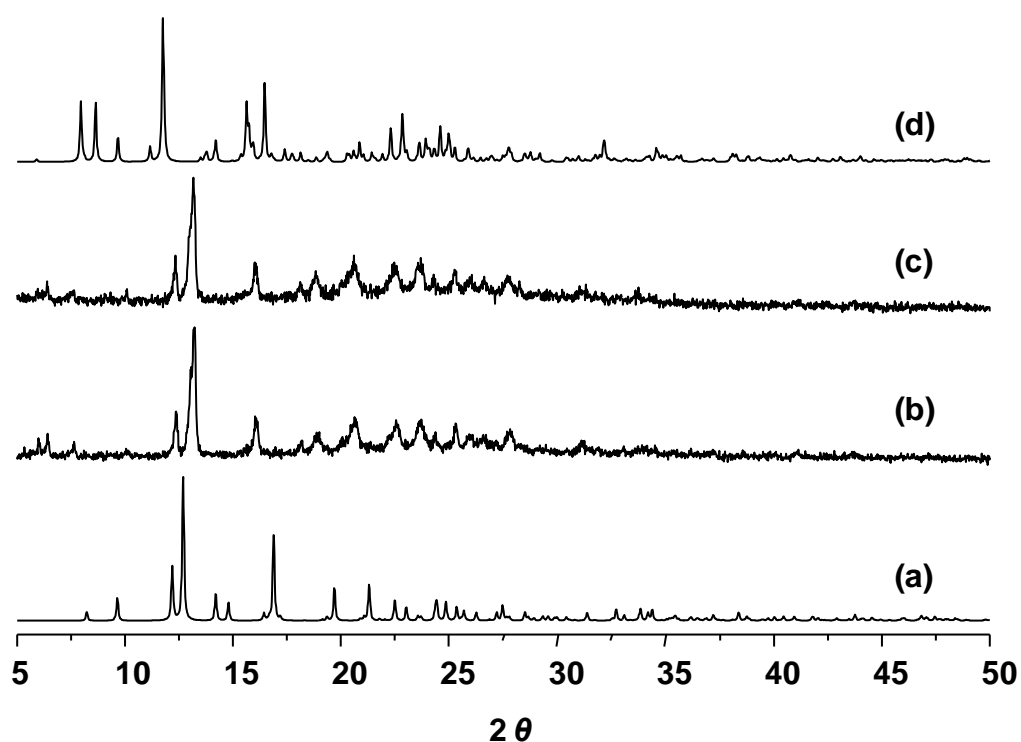

Fig. S1 PXRD patterns of (a) **1** simulated, (b) heating product of **1** in H<sub>2</sub>O/CH<sub>3</sub>CN at 80 °C, (c) heating product of **1** in H<sub>2</sub>O/CH<sub>3</sub>CN at 90 °C, (d) **2** simulated.
